# Supplementary material for: A highly sensitive SERS sensor based on PVDF/Au nanofibers for trace analysis of nitrite ions
Source: Royal Society of Chemistry journal article supplement (doi:10.1039/d4ay01396d), 2024-01-01
Supplement: d4ay01396d1.pdf [file d4ay01396d1.pdf]

## Supplementary Information

### A highly sensitive SERS sensor based on PVDF/Au nanofibers for trace analysis of nitrite ions

Mei Sun<sup>1,2\*#</sup>, Xiaoyi Tang<sup>1,2#</sup>, Ke Chen<sup>1,2</sup>, Hanmei Hu<sup>1,2</sup>, Mingdi Yang<sup>a,b</sup>

Haiou Zhou<sup>1,2</sup>, Ping Chen<sup>3\*</sup>

<sup>1</sup>*School of Materials and Chemical Engineering of Anhui Jianzhu University, Hefei, 230601, PR China*

<sup>2</sup>*Anhui Province Key Laboratory of Advanced Building Materials, Anhui Jianzhu University, Hefei, 230601, PR China*

<sup>3</sup>*Institutes of Advanced Technology, University of Science and Technology of China, Hefei, 230027, PR China*

\* Corresponding author

E-mail: 78dinosaur@163.com, pingchen@ustc.edu.cn

# The authors contributed equally to this work.

#### Materials

Poly(vinylidene fluoride) (PVDF,  $MW = 534000 \text{ g.mol}^{-1}$ ) and Polyhexenoltone (PCL,  $MW=45000 \text{ g.mol}^{-1}$ ) were purchased from Sigma-Aldrich. Acetone, N,N-Dimethylacetamide (DMF), sodium nitrite were obtained from Sinopharm Chemical Reagent Co. Thiram, rhodamine 6G (R6G) and p-aminothiophenol (PATP) were purchased from Aladdin Chemistry Co.

#### Instrumentation and Characterization

The characterization of the products were analyzed by using JEOLJSM-7500F Scanning Electron Microscope, a BrukerD8 ADVANCEX-ray diffractometer (XRD) with Cu  $K\alpha$  radiation ( $\lambda = 1.5418 \text{ \AA}$ ), a Nicolet6700 FTIR spectrometer at  $4 \text{ cm}^{-1}$  resolution, 60 scans, in the  $4000\text{-}600 \text{ cm}^{-1}$  spectral range. X-ray photoelectron spectroscopy (XPS) analysis was performed on a Thermo Scientific ESCALAB QXi.

The SERS properties were analyzed by using an InVia Raman microscope (Renishaw) equipped with a laser emitting at 785 nm. PVDF nanofibers were prepared by electrospinning device (FM1301A, Beijing Future Material Sci-tech Co., Ltd, China).

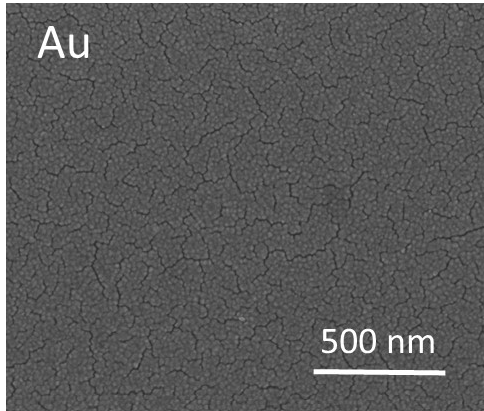

Fig.S1 SEM image of Au NPs deposited on glass plates

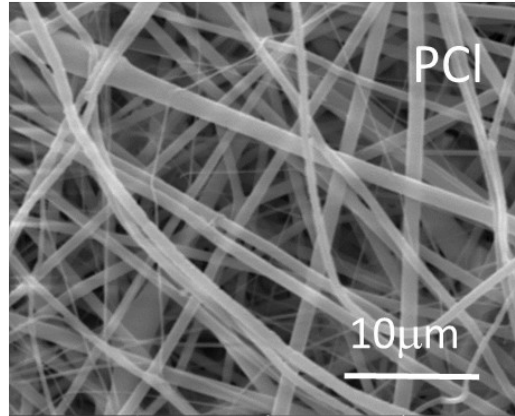

Fig.S2 SEM image of PCI

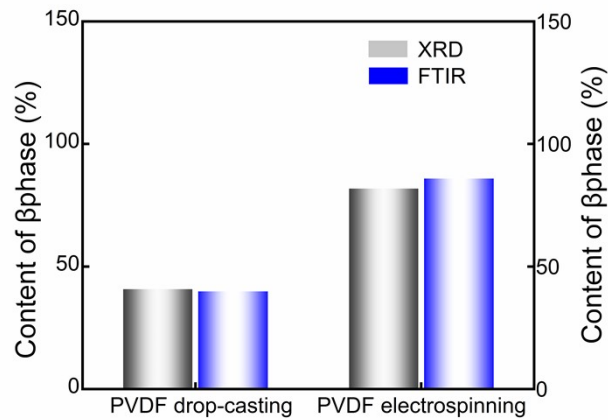

Fig. S3 Comparison of  $\beta$ -phase content in the PVDF drop-casting film and nanospun fibers

Table S1 Comparison of our work with the literatures for the detection limits of R6G, PATP, and thiram

| detection platform                                      | R6G                   | PATP         | thiram               | Reference |
|---------------------------------------------------------|-----------------------|--------------|----------------------|-----------|
| Ag/SiNP microfluidic channe                             | $10^{-4}$ M           |              |                      | 1         |
| Fe <sub>3</sub> O <sub>4</sub> @SiO <sub>2</sub> @Ag    |                       | $10^{-7}$ M  | $10^{-7}$ M          | 2         |
| Fe <sub>3</sub> O <sub>4</sub> /Au                      |                       |              | $10^{-7}$ M          |           |
| Au-Fe <sub>3</sub> O <sub>4</sub>                       | $10^{-10}$ M          |              |                      | 3         |
| Silver nanodishes                                       | $5 \times 10^{-12}$ M |              | $10^{-7}$ M          | 4         |
| Fe <sub>3</sub> O <sub>4</sub> @SiO <sub>2</sub> @Au@Ag |                       |              |                      |           |
| Au@ Ag                                                  |                       |              | $5 \times 10^{-9}$ M | 5         |
| ASFPAN-Ag                                               | 10 ppb                |              |                      | 6         |
| AgNPs/PEI/PVA                                           | $10^{-10}$ M          | $10^{-8}$ M  |                      | 7         |
| PVDF/Ag                                                 | 0.1 nM                |              |                      | 8         |
| Fe <sub>3</sub> O <sub>4</sub> @SiO <sub>2</sub> @Ag    |                       | $10^{-7}$ M  | $10^{-6}$ M          | 9         |
| NiCo@SiO <sub>2</sub> @Ag                               |                       | $10^{-7}$ M  |                      | 10        |
| MIL-101(Fe)@Ag                                          |                       | $10^{-8}$ M  |                      | 11        |
| this work                                               | $10^{-11}$ M          | $10^{-10}$ M | $10^{-9}$ M          |           |

## References

1. Y. Zhao, Y.-L. Zhang, J.-A. Huang, Z. Zhang, X. Chen and W. Zhang, *Journal of Materials Chemistry A*, 2015, **3**, 6408-6413.
2. Q. He, A. Zhao, L. Li, H. Sun, D. Wang, H. Guo, M. Sun and P. Chen, *New Journal of Chemistry*, 2017, **41**, 1582-1590.
3. Q. Gao, A. Zhao, H. Guo, X. Chen, Z. Gan, W. Tao, M. Zhang, R. Wu and Z. Li, *Dalton Trans*, 2014, **43**, 7998-8006.
4. W. Tao, A. Zhao, H. Sun, Z. Gan, M. Zhang, D. Li and H. J. R. A. Guo, 2013, **4**, 3487-3493.
5. B. Liu, G. Han, Z. Zhang, R. Liu, C. Jiang, S. Wang and M. Y. Han, *Anal Chem*, 2012, **84**, 255-261.
6. L. Zhang, X. Gong, Y. Bao, Y. Zhao, M. Xi, C. Jiang and H. Fong, *Langmuir*, 2012, **28**, 14433-14440.
7. T. Yang, J. Ma, S. J. Zhen and C. Z. Huang, *ACS Appl Mater Interfaces*, 2016, **8**, 14802-14811.
8. C.-y. Chin, C.-c. Chen, X.-a. Chen, H.-j. Yen, H.-l. Hsien, J.-j. Young and Y.-c. Chen, *Sensors and Actuators B: Chemical*, 2021, **347**.
9. L. Li, A. Zhao, D. Wang, H. Guo, H. Sun and Q. He, *Journal of Nanoparticle Research* 2016, **18**, 178.
10. A. Z. Maofeng Zhang, Dapeng Wang and H. Sun, *Analyst*, 2015, **140**, 440-448.
11. Y. Chen and N. Zhao, *Chemical Papers* 2024, **78**, 3761-3772.
